# Supplementary material for: Polyanions provide selective control of APC/C interactions with the activator subunit
Source: PubMed Central journal article supplement (PMC6925294; doi:10.1038/s41467-019-13864-1), 2019-12-20
Supplement: 41467_2019_13864_MOESM1_ESM.pdf [file 41467_2019_13864_MOESM1_ESM.pdf]

## **Supplementary Information**

**Polyanions provide selective control of APC/C interactions with the activator subunit**

Arda Mizrak and David O. Morgan

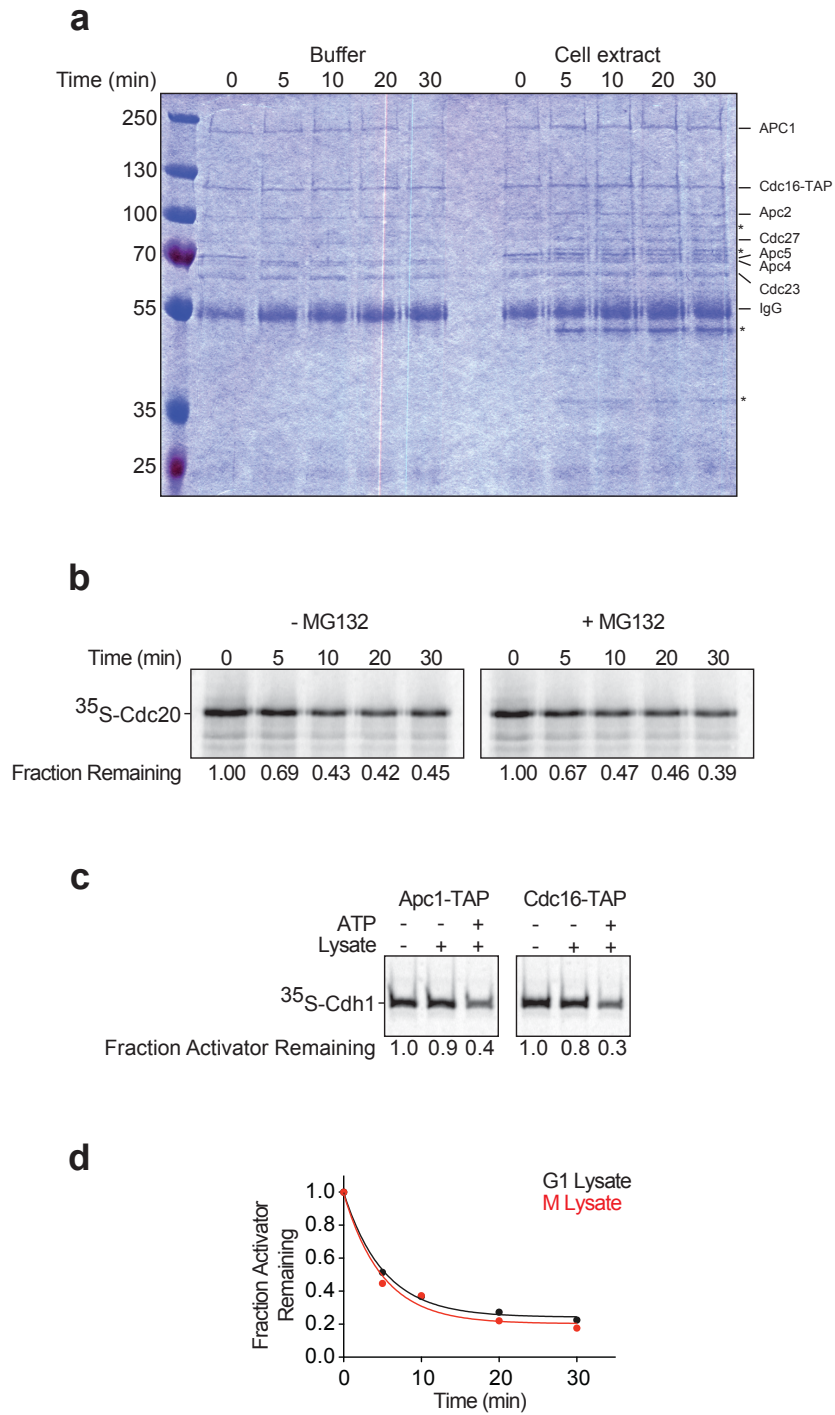

### Supplementary Figure 1. Characterization of dissociation activity

**a.** APC/C subunits remain intact during the activator dissociation reaction. As in Fig. 1c, dissociation reactions were performed with buffer or yeast lysates, terminated at the indicated times, and analyzed by SDS-PAGE and staining with Coomassie Blue. Nonspecific lysate proteins that bind to IgG beads are indicated by asterisks.

**b.** Cdc20 dissociation reactions were performed with yeast lysate (2.5 mg/ml) in the absence (left) or presence (right) of the proteasome inhibitor MG132 (50  $\mu$ M) plus 5 mM ATP. Uncropped autoradiograph and source data are provided in the Source Data file.

**c.** APC/C was immunopurified from lysates of cells carrying TAP-tagged Apc1 (left) or Cdc16 (right), and Cdh1 dissociation reactions were performed with yeast lysate plus 5 mM ATP. Uncropped autoradiograph and source data are provided in the Source Data file.

**d.** Lysates were prepared from wild-type cells arrested in G1 using  $\alpha$ -factor (1  $\mu$ g/ml) or in metaphase with nocodazole (15  $\mu$ g/ml) and tested in Cdh1 dissociation assays in the presence of 5 mM ATP. Uncropped autoradiograph and source data are provided in the Source Data file.

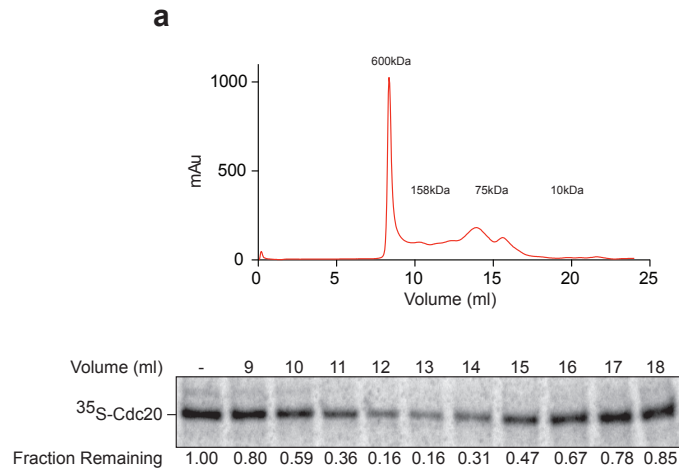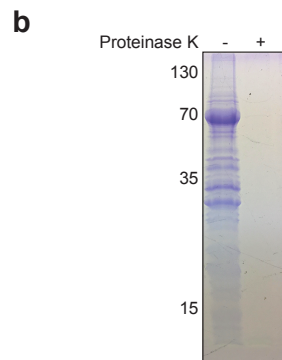

### Supplementary Figure 2. Molecular size of dissociation activity

**a.** Yeast lysates were applied to a DEAE-Fast flow ion exchange column, and dissociation activity was eluted with 500 mM KOAc, concentrated and applied to a Superdex 200 gel filtration column. Top panel shows the UV absorbance (280 nm) of the eluate. In the bottom panel, fractions were concentrated 10-fold and used in a Cdc20 dissociation reaction, supplemented with 5 mM ATP. Uncropped autoradiograph and source data are provided in the Source Data file.

**b.** As described in Fig. 2d, the hydroxyapatite flow-through fraction from Fig. 2b was treated with buffer (left) or 0.5 U of Proteinase K (right) at 37°C for 1 h, followed by SDS-PAGE and staining with Coomassie Blue. Proteinase K treatment resulted in loss of all visible protein bands. Uncropped gel is provided in the Source Data file.

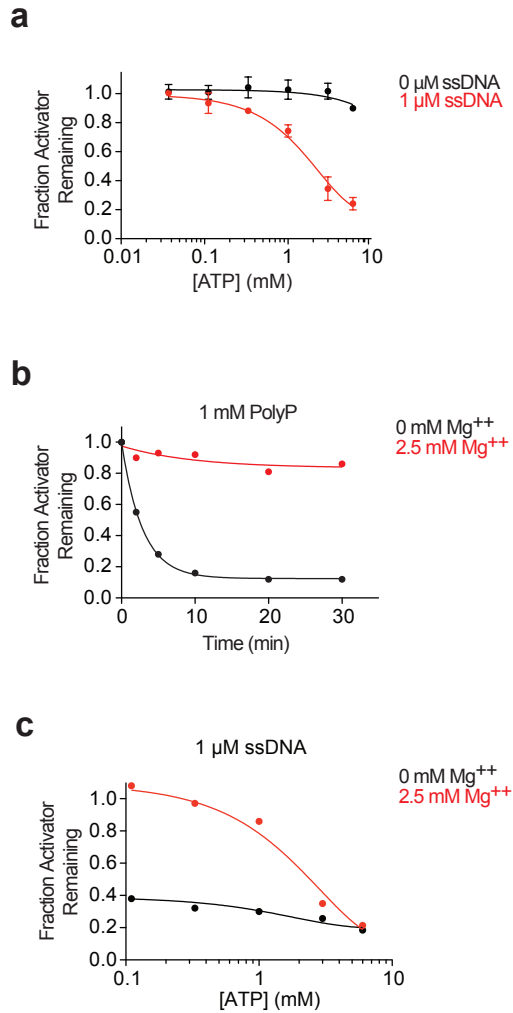

**Supplementary Figure 3. ATP stimulates nucleic acid-dependent dissociation by sequestering magnesium ions**

**a.** ATP alone is not sufficient for dissociation. Varying ATP concentrations were tested in Cdh1 dissociation assays. Reactions were performed with buffer alone (black) or 1  $\mu$ M 75mer ssDNA (red) in the presence of 2.5 mM MgCl<sub>2</sub>. Data indicate means (+/- SEM) from two independent experiments. Uncropped autoradiographs and source data are provided in the Source Data file.

**b.** Magnesium inhibits the effects of polyphosphate. Cdh1 dissociation reactions were performed using polyphosphate (1 mM total PO<sub>4</sub><sup>-</sup>) in the absence (black) or presence (red) of 2.5 mM MgCl<sub>2</sub>. Uncropped autoradiograph and source data are provided in the Source Data file.

**c.** ATP stimulates activator dissociation only when magnesium is present. Cdh1 dissociation reactions were performed using 1  $\mu$ M 75mer ssDNA. ATP was serially diluted and added to reactions in the absence (black) or presence (red) of 2.5 mM MgCl<sub>2</sub>. Uncropped autoradiograph and source data are provided in the Source Data file.

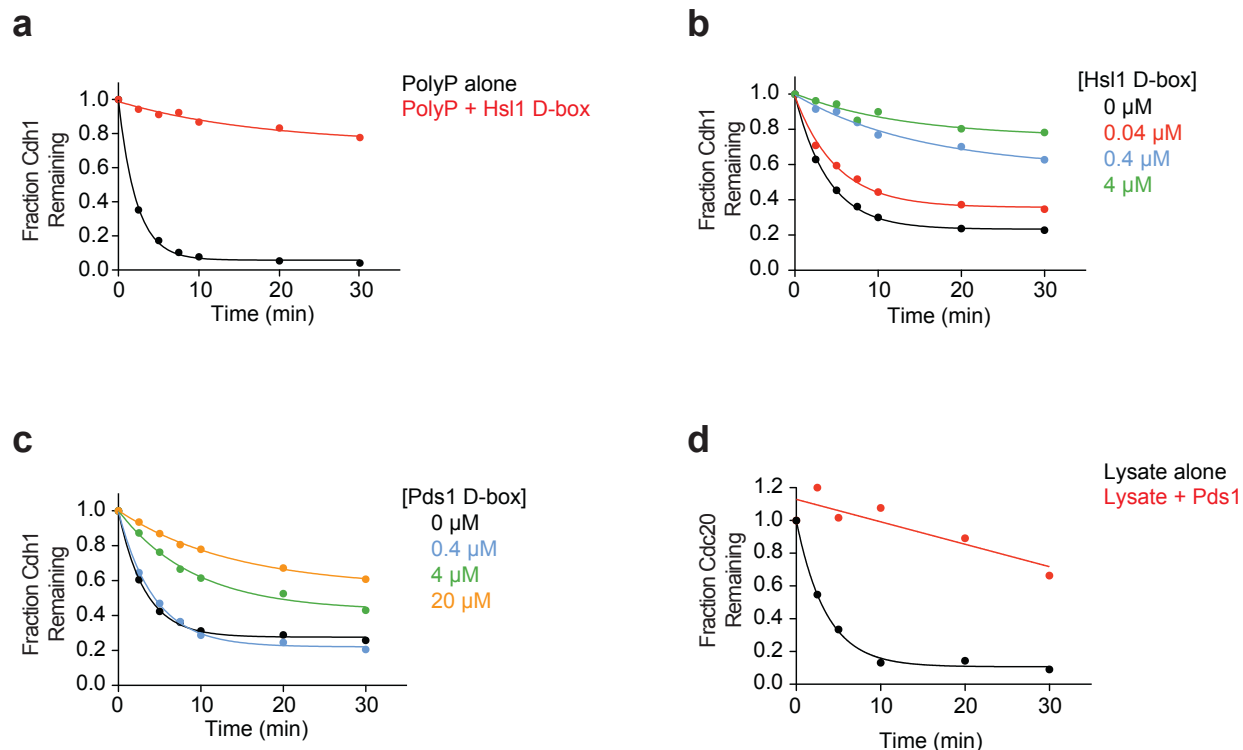

### Supplementary Figure 4. D-box binding inhibits activator dissociation

**a.** Cdh1 dissociation was measured in the presence of polyphosphate (1 mM total  $\text{PO}_4^-$ ) with (red) or without (black) 4  $\mu\text{M}$  Hsl1 D-box peptide. Uncropped autoradiograph and source data are provided in the Source Data file.

**b, c.** Cdh1 dissociation was measured in the presence of 1.5  $\mu\text{M}$  75mer ssDNA and varying concentrations of Hsl1 (**b**) or Pds1 (**c**) D-box peptides (black 0  $\mu\text{M}$ , red 0.04  $\mu\text{M}$ , blue 0.4  $\mu\text{M}$ , green 4  $\mu\text{M}$ , orange 20  $\mu\text{M}$ ). Reactions were supplemented with 3 mM ATP. Uncropped autoradiographs and source data are provided in the Source Data file.

**d.** Cdc20 dissociation reactions were performed in the presence of yeast lysate (2.5 mg/ml) and 5 mM ATP, in the absence (black) or presence (red) of 10  $\mu\text{M}$  Pds1 fragment (aa 1-110). His-tagged Pds1 fragment was expressed in bacteria and purified using a nickel column. Uncropped autoradiograph and source data are provided in the Source Data file.

**Supplementary Table 1. Nucleic acid and peptide sequences used in this study**

T7 antisense sequences were annealed with T7 promoter sequence and used for transcription of the indicated RNAs *in vitro*.

|                       |                                                                                                              |
|-----------------------|--------------------------------------------------------------------------------------------------------------|
| T7-tQ(UUG) antisense  | GGAGGTCCCACCCGGATTCTGAACCTGGGGTTGTTCCGGATCAGAACCGAAAG<br>TGATAACCACTACACTATAGGACCTATAGTGAGTCGTATTAATTTTC     |
| T7-tS(AGA) antisense  | CGACAACTGCAGGACTCGAACCTGCGCGGGCAAAGCCCAAAGATTTCTAA<br>TCTTTCGCCTTAACCACTCGGCCAAGTTGCCTATAGTGAGTCGTATTAATTTTC |
| T7 random N antisense | NNNNNNNNNNNNNNNNNNNNNNNNNNNNNNNNNNNNNNNNNNNNNNNNNNNNNN<br>NNNNNNNNNNNNNNNNNNNNNNCCCTATAGTGAGTCGTATTAATTTTC   |
| T7 Promoter           | GAAATTAATACGACTCACTATA                                                                                       |
| 25-base ssDNA         | AGTTCAGACCAATTGGTAGTTTGTC                                                                                    |
| 50-base ssDNA         | TAGGCAGAAGCGGCTACCAAGGTGAATTAATGCGCTTATACACCAATAGG                                                           |
| 75-base ssDNA #1      | TAGTGACTGGTTTAGCGTCATACCTAGGAGTCCGCACACGGAAACGTGACAT<br>ATCGCTGGATTAACGACCCGAGA                              |
| 75-base ssDNA #2      | TCTCGGGTCGTTAATCCAGCGATATGTCACGTTTCCGTGTGCGGACTCCTAG<br>GTATGACGCTAAACCAGTCACTA                              |

|                           |                            |
|---------------------------|----------------------------|
| Hsl1 D-box                | QNKPKRAALSDITNSFNKMNK-Cy5  |
| Hsl1 D-box <sup>mut</sup> | QNKPKAAAASDITASFNKMNK-Cy5  |
| Hsl1 KEN box              | GVSTNKENEGPEYPTKIEK-Cy5    |
| Pds1 D-box                | AQQQGRLPLAAKDNNRSKSFIL-Cy5 |
